# Supplementary material for: Negative density dependence promotes persistence of a globally rare yet locally abundant plant species (Oenothera coloradensis)
Source: bioRxiv or medRxiv preprint supplement (doi:10.1101/2023.10.25.563615), 2023-10-29
Supplement: Supplementary file [file media-1.pdf]

1 **Negative density dependence promotes persistence of a globally**  
2 **rare yet locally abundant plant species (*Oenothera coloradensis*)**

3 **Supplementary Materials**

4 **Species Information**

5 *Oenothera coloradensis* seeds are contained within small, indehiscent capsules that con-  
6 tain 2-5 seeds each (Burgess, Hild, & Shaw, 2005). A single adult individual can produce  
7 >500 capsules. This species does not reproduce vegetatively, although seeds typically ger-  
8minate near the base of the parent plant, which often results in dense patches of vegetative  
9 individuals (Heidel, Tuthill, & Wallace, 2021). *O. coloradensis* is pollinated primarily by  
10 hawkmoths (Krakos, pers. comm. to B. Heidel, 2013). Seed dispersers are unknown (Floyd  
11 & Ranker, 1998; Heidel et al., 2021). Previous work established that *O. coloradensis* pop-  
12 ulation growth rate is particularly impacted by recruitment of seedlings (Floyd & Ranker,  
13 1998). Recruitment increases when non-*O. coloradensis* community biomass is removed, in-  
14 dicating that surrounding grasses and forbs outcompete or shade-out seedlings (Munk, Hild,  
15 & Whitson, 2002).

16 *O. coloradensis* commonly co-occurs with *Agrostis stolonifera*, *Pascopyrum smithii*, *Poa*  
17 *pratensis*, *Glycyrrhiza lepidota*, *Iris missouriensis*, *Cirsium flodmanii*, and *Grindelia squar-*  
18 *rosa* (Endangered and Threatened Wildlife and Plants, 2000; Munk et al., 2002). Encroach-  
19 ment of woody shrubs such as *Salix exigua* has been correlated with declining numbers in  
20 some populations (Heidel et al., 2021).

21 The Wyoming Natural Diversity Database (WYNDD) began a base-wide census of re-

22 productive individuals in the FEWAFB population in 1986, and has repeated this census  
23 annually since 1988 (Heidel et al., 2021). The first estimate of species size after its full  
24 geographic range was identified occurred in 1998, when it was approximated that the entire  
25 species consisted of 47,300 to 50,300 reproductive individuals (Fertig, 2000).

## 26 **Seed Production Estimation**

27 It was not possible to measure seed production exactly because *O. coloradensis* seeds are  
28 contained in indehiscent capsules. Additionally, buds on the same individual flower and set  
29 seed with a time lag of up to several weeks, so mature seed capsules often exist at the tip of  
30 a stem while un-opened buds lower down on that same stem have not yet flowered. This lag  
31 makes it difficult to count the total number of capsules produced by an individual. However,  
32 seed capsules leave a noticeable scar on the stem, so we used the number of seed capsule scars  
33 on reproductive stems as an estimate of capsule production. Counting scars is extremely  
34 time-intensive since a single plant can produce several hundred capsules, so we used Poisson  
35 generalized linear regression to estimate the relationship between the length of stem bearing  
36 capsule scars and the number of capsules produced by that stem. A Poisson regression model  
37 fit to stem measurements and capsule counts from 106 individuals in 2018 indicated that  
38 the number of capsules produced by an individual ( $C$ ) can be predicted by  $e^{(1.843+0.119 \times S)}$ ,  
39 where  $S$  is the stem length in cm (pseudo  $R^2 = 0.42$ ,  $P < 0.01$ , Residual deviance = 186.98,  
40  $df = 104$ ) (Fig. S2). We used this relationship to estimate capsule production for each  
41 reproductive individual. Previous work indicated that each capsule contained an average of  
42 4 seeds, so we multiplied the estimated number of capsules produced by an adult plant by 4  
43 to estimate seed production (Burgess et al., 2005).

## 44 Discrete Vital Rate Parameters

45 Previously-published data from a greenhouse experiment using *O. coloradensis* seed cap-  
46 sules collected from the FEWAFB populations determined that viable seeds had an average  
47 germination rate of 20.3% after cold-stratification, and did not identify a consistent decline  
48 in germination rate over five years (Burgess et al., 2005). This study also found that 58.5%  
49 of seeds produced were viable. We conducted an additional seed study to determine if over-  
50 wintering in natural conditions lead to a lower germination rate than was identified in the  
51 previous greenhouse study. We buried 60 field-collected seed capsules in mesh bags at 6  
52 locations near our demographic study plots at FEWAFB, and then recovered the seed bags  
53 after one winter. An average of 10% of seed capsules were not recoverable, likely because  
54 they were non-viable and withered away or were eaten. We planted the recovered capsules  
55 in standard greenhouse conditions, and found a mean germination rate of 6.8%. This germi-  
56 nation rate was much lower than that identified by Burgess et al., however our seed study  
57 had a much smaller sample size, reducing the reliability of our result (Burgess et al., 2005).  
58 However, it is still likely that true germination rates are much lower than those identified in  
59 greenhouse conditions, so we reduced the germination rate identified by Burgess et al. by  
60 20%.

## 61 Seedling Data

62 Although seedlings (above-ground plants  $< 3$  cm in leaf length) were only tallied in each  
63 plot quadrant and year instead of tagged and measured, we incorporated them into the  
64 dataset for continuous, above-ground plants by assigning them a random size drawn from a

65 continuous, uniform probability distribution (seedling size  $\sim U(0.1, 3)$ ). Each new recruit  
 66 to the  $> 3$  cm stage in year  $t + 1$  was randomly assigned to a seedling within the same plot  
 67 quadrant in year  $t$ . Seedlings in year  $t$  that were assigned a recruit in year  $t + 1$  survived,  
 68 while those without an assigned recruit died. Incorporating seedlings into the continuous  
 69 dataset in this fashion allowed us to create IPMs using only one discrete stage.

70 Table S1: Permanent Plot Locations and subpopulation-level sample sizes for each year and  
 71 individual type (seedling vs. non-seedling). GPS coordinates listed in decimal degrees, map  
 72 datum and spheroid: WGS 84.

| Site      | Subpopulation | Plot Name | N Coord. | W Coord.   | Sample Size  |          |              |          |              |          |
|-----------|---------------|-----------|----------|------------|--------------|----------|--------------|----------|--------------|----------|
|           |               |           |          |            | 2018         |          | 2019         |          | 2020         |          |
|           |               |           |          |            | non-seedling | seedling | non-seedling | seedling | non-seedling | seedling |
| FEWAFB    | Unnamed Creek | U3        | 41.13642 | -104.87209 |              |          |              |          |              |          |
|           | Unnamed Creek | U4        | 41.13634 | -104.87183 | 740          | 525      | 528          | 417      | 406          | 530      |
|           | Unnamed Creek | U6        | 41.13647 | -104.87132 |              |          |              |          |              |          |
|           | Diamond Creek | D7        | 41.14340 | -104.88380 |              |          |              |          |              |          |
|           | Diamond Creek | D10       | 41.14441 | -104.88303 | 235          | 209      | 347          | 149      | 275          | 81       |
|           | Diamond Creek | D11       | 41.14431 | -104.88094 |              |          |              |          |              |          |
|           | Crow Creek    | C4        | 41.15540 | -104.87497 |              |          |              |          |              |          |
|           | Crow Creek    | C5        | 41.15477 | -104.87474 | 203          | 127      | 214          | 98       | 150          | 160      |
|           | Crow Creek    | C8        | 41.15534 | -104.87487 |              |          |              |          |              |          |
| Soapstone | Pasture HQ5   | S1        | 40.99297 | -105.00925 |              |          |              |          |              |          |
|           | Pasture HQ5   | S2        | 40.99318 | -105.00935 | 283          | 772      | 714          | 813      | 641          | 423      |
|           | Pasture HQ5   | S3        | 40.99342 | -105.00937 |              |          |              |          |              |          |
|           | Pasture HQ3   | S4        | 40.98623 | -105.01691 |              |          |              |          |              |          |
|           | Pasture HQ3   | S5        | 40.98639 | -105.01671 | 102          | 138      | 158          | 173      | 117          | 104      |
|           | Pasture HQ3   | S6        | 40.98650 | -105.01656 |              |          |              |          |              |          |
|           | Meadow        | S7        | 40.98753 | -105.02148 |              |          |              |          |              |          |
|           | Meadow        | S8        | 40.98747 | -105.02179 | 44           | 31       | 47           | 28       | 48           | 12       |
|           | Meadow        | S9        | 40.98724 | -105.02145 |              |          |              |          |              |          |

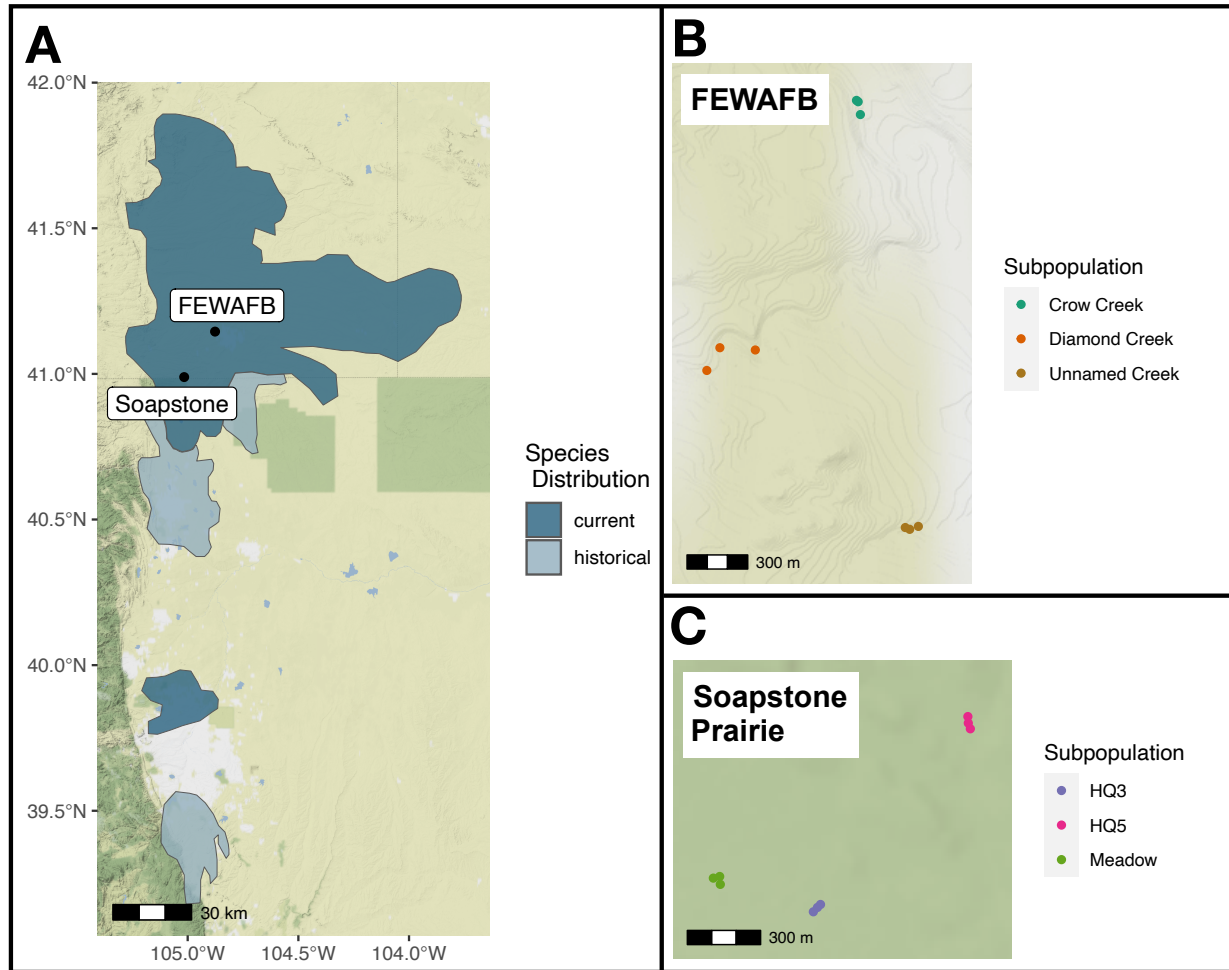

73 Figure S1: (A) The current known distribution of *O. coloradensis*, shown in dark blue,  
 74 extends into Wyoming, Colorado, and Nebraska. The historical distribution included the  
 75 current distribution area as well as some additional locations shown in pale blue. Distribution  
 76 information comes from Everson, 2019. Black dots show the relative locatino of the FEWAFB  
 77 and Soapstone prairie populations included in this study. Colored dots show the location of  
 78 plots in each subpopulation at FEWAFB (B) and Soapstone Prairie (C).

Table S2: Continuous vital rate functions used in each IPM. In the functions below,  $size_t$  indicates plant longest leaf length in the previous year,  $N_t$  indicates number of individuals in a plot in the previous year,  $T_G$  indicates mean temperature in the previous year's growing season, and  $T_W$  indicates the mean temperature in winter of the previous year.

| IPM   | Vital Rate | Equation                                                                           |
|-------|------------|------------------------------------------------------------------------------------|
| A & B | Survival   | $logit(s(z)) = -0.21 + 0.37(\ln(size_t))$                                          |
|       | Flowering  | $logit(Pb(z)) = -34.06 + 27.67(\ln(size_t)) - 5.78(\ln(size_t))^2$                 |
|       | Growth     | $G(z', z) = N(\mu_s, \sigma_s); \mu_s = 1.57 + 0.18(\ln(size_t)); \sigma_s = 0.51$ |

|   |              |                                                                                    |
|---|--------------|------------------------------------------------------------------------------------|
|   | Seed prod.   | $exp(b(z)) = 3.35 + 1.19(\ln(size_t))$                                             |
|   | Recruit size | $c_o(z') = N(\mu_r, \sigma_r); \mu_r = 0.21; \sigma_r = 0.77$                      |
| C | Survival     | $logit(s(z)) = -0.73 + 0.45(\ln(size_t))$                                          |
|   | Flowering    | $logit(Pb(z)) = -40.31 + 33.40(\ln(size_t)) - 7.09(\ln(size_t))^2$                 |
|   | Growth       | $G(z', z) = N(\mu_s, \sigma_s); \mu_s = 1.64 + 0.11(\ln(size_t)); \sigma_s = 0.42$ |
|   | Seed prod.   | $exp(b(z)) = 3.73 + 1.01(\ln(size_t))$                                             |
|   | Recruit size | $c_o(z') = N(\mu_r, \sigma_r); \mu_r = 0.19; \sigma_r = 0.76$                      |
| D | Survival     | $logit(s(z)) = 1.01 + -0.01(\ln(size_t))$                                          |
|   | Flowering    | $logit(Pb(z)) = -44.52 + 36.73(\ln(size_t)) - 7.69(\ln(size_t))^2$                 |
|   | Growth       | $G(z', z) = N(\mu_s, \sigma_s); \mu_s = 1.84 + 0.26(\ln(size_t)); \sigma_s = 0.52$ |
|   | Seed prod.   | $exp(b(z)) = 3.80 + 1.11(\ln(size_t))$                                             |
|   | Recruit size | $c_o(z') = N(\mu_r, \sigma_r); \mu_r = 0.22; \sigma_r = 0.78$                      |
| E | Survival     | $logit(s(z)) = 0.21 + 0.18(\ln(size_t))$                                           |
|   | Flowering    | $logit(Pb(z)) = -18.73 + 15.84(\ln(size_t)) - 3.63(\ln(size_t))^2$                 |
|   | Growth       | $G(z', z) = N(\mu_s, \sigma_s); \mu_s = 1.74 + 0.24(\ln(size_t)); \sigma_s = 0.49$ |
|   | Seed prod.   | $exp(b(z)) = 3.83 + 0.92(\ln(size_t))$                                             |
|   | Recruit size | $c_o(z') = N(\mu_r, \sigma_r); \mu_r = 0.19; \sigma_r = 0.80$                      |
| F | Survival     | $logit(s(z)) = 0.54 + 0.24(\ln(size_t))$                                           |
|   | Flowering    | $logit(Pb(z)) = -27.49 + 20.83(\ln(size_t)) - 4.04(\ln(size_t))^2$                 |
|   | Growth       | $G(z', z) = N(\mu_s, \sigma_s); \mu_s = 1.62 + 0.16(\ln(size_t)); \sigma_s = 0.44$ |
|   | Seed prod.   | $exp(b(z)) = 1.72 + 1.51(\ln(size_t))$                                             |
|   | Recruit size | $c_o(z') = N(\mu_r, \sigma_r); \mu_r = 0.15; \sigma_r = 0.80$                      |
| G | Survival     | $logit(s(z)) = -0.19 + 0.30(\ln(size_t))$                                          |
|   | Flowering    | $logit(Pb(z)) = -32.72 + 23.50(\ln(size_t)) - 4.23(\ln(size_t))^2$                 |
|   | Growth       | $G(z', z) = N(\mu_s, \sigma_s); \mu_s = 1.42 + 0.21(\ln(size_t)); \sigma_s = 0.42$ |
|   | Seed prod.   | $exp(b(z)) = 0.83 + 2.06(\ln(size_t))$                                             |
|   | Recruit size | $c_o(z') = N(\mu_r, \sigma_r); \mu_r = 0.21; \sigma_r = 0.77$                      |
| H | Survival     | $logit(s(z)) = -0.32 + 0.62(\ln(size_t))$                                          |
|   | Flowering    | $logit(Pb(z)) = -31.04 + 23.96(\ln(size_t)) - 4.71(\ln(size_t))^2$                 |
|   | Growth       | $G(z', z) = N(\mu_s, \sigma_s); \mu_s = 1.50 + 0.05(\ln(size_t)); \sigma_s = 0.43$ |
|   | Seed prod.   | $exp(b(z)) = 2.53 + 1.59(\ln(size_t))$                                             |
|   | Recruit size | $c_o(z') = N(\mu_r, \sigma_r); \mu_r = 0.23; \sigma_r = 0.76$                      |
| I | Survival     | $logit(s(z)) = -0.33 + 0.46(\ln(size_t)) - 0.0003(N_t)$                            |

|   |              |                                                                                                         |
|---|--------------|---------------------------------------------------------------------------------------------------------|
|   | Flowering    | $\text{logit}(Pb(z)) = -41.36 + 33.73(\ln(\text{size}_t)) - 7.21(\ln(\text{size}_t)^2) + 0.0008(N_t)$   |
|   | Growth       | $G(z', z) = N(\mu_s, \sigma_s); \mu_s = 2.19 + 0.14(\ln(\text{size}_t)) - 0.0005(N_t); \sigma_s = 0.42$ |
|   | Seed prod.   | $\exp(b(z)) = 3.73 + 1.01(\ln(\text{size}_t))$                                                          |
|   | Recruit size | $c_o(z') = N(\mu_r, \sigma_r); \mu_r = 0.19; \sigma_r = 0.76$                                           |
| J | Survival     | $\text{logit}(s(z)) = 17.59 + 0.05(\ln(\text{size}_t)) - 0.03(N_t)$                                     |
|   | Flowering    | $\text{logit}(Pb(z)) = -46.27 + 37.38(\ln(\text{size}_t)) - 7.83(\ln(\text{size}_t)^2) + 0.002(N_t)$    |
|   | Growth       | $G(z', z) = N(\mu_s, \sigma_s); \mu_s = 3.70 + 0.28(\ln(\text{size}_t)) - 0.004(N_t); \sigma_s = 0.51$  |
|   | Seed prod.   | $\exp(b(z)) = 3.80 + 1.11(\ln(\text{size}_t))$                                                          |
|   | Recruit size | $c_o(z') = N(\mu_r, \sigma_r); \mu_r = 0.22; \sigma_r = 0.78$                                           |
| K | Survival     | $\text{logit}(s(z)) = -13.85 + 0.20(\ln(\text{size}_t)) + 0.04(N_t)$                                    |
|   | Flowering    | $\text{logit}(Pb(z)) = -21.21 + 15.50(\ln(\text{size}_t)) - 3.55(\ln(\text{size}_t)^2) + 0.009(N_t)$    |
|   | Growth       | $G(z', z) = N(\mu_s, \sigma_s); \mu_s = -0.49 + 0.24(\ln(\text{size}_t)) + 0.006(N_t); \sigma_s = 0.48$ |
|   | Seed prod.   | $\exp(b(z)) = 3.83 + 0.92(\ln(\text{size}_t))$                                                          |
|   | Recruit size | $c_o(z') = N(\mu_r, \sigma_r); \mu_r = 0.19; \sigma_r = 0.80$                                           |
| L | Survival     | $\text{logit}(s(z)) = 33.06 + 0.24(\ln(\text{size}_t)) - 0.44(N_t)$                                     |
|   | Flowering    | $\text{logit}(Pb(z)) = -26.23 + 21.0(\ln(\text{size}_t)) - 4.01(\ln(\text{size}_t)^2) - 0.02(N_t)$      |
|   | Growth       | $G(z', z) = N(\mu_s, \sigma_s); \mu_s = 15.89 + 0.17(\ln(\text{size}_t)) - 0.19(N_t); \sigma_s = 0.43$  |
|   | Seed prod.   | $\exp(b(z)) = 1.72 + 1.51(\ln(\text{size}_t))$                                                          |
|   | Recruit size | $c_o(z') = N(\mu_r, \sigma_r); \mu_r = 0.15; \sigma_r = 0.80$                                           |
| M | Survival     | $\text{logit}(s(z)) = 5.39 + 0.37(\ln(\text{size}_t)) - 0.02(N_t)$                                      |
|   | Flowering    | $\text{logit}(Pb(z)) = -32.79 + 24.02(\ln(\text{size}_t)) - 4.34(\ln(\text{size}_t)^2) - 0.002(N_t)$    |
|   | Growth       | $G(z', z) = N(\mu_s, \sigma_s); \mu_s = 2.26 + 0.23(\ln(\text{size}_t)) - 0.003(N_t); \sigma_s = 0.39$  |
|   | Seed prod.   | $\exp(b(z)) = 0.83 + 2.06(\ln(\text{size}_t))$                                                          |
|   | Recruit size | $c_o(z') = N(\mu_r, \sigma_r); \mu_r = 0.21; \sigma_r = 0.77$                                           |
| N | Survival     | $\text{logit}(s(z)) = 4.30 + 0.87(\ln(\text{size}_t)) - 0.004(N_t)$                                     |

|   |              |                                                                                                                               |
|---|--------------|-------------------------------------------------------------------------------------------------------------------------------|
|   | Flowering    | $\text{logit}(Pb(z)) = -28.50 + 25.52(\ln(\text{size}_t)) - 4.93(\ln(\text{size}_t)^2) - 0.004(N_t)$                          |
|   | Growth       | $G(z', z) = N(\mu_s, \sigma_s); \mu_s = 2.76 + 0.16(\ln(\text{size}_t)) - 0.001(N_t); \sigma_s = 0.36$                        |
|   | Seed prod.   | $\exp(b(z)) = 2.53 + 1.59(\ln(\text{size}_t))$                                                                                |
|   | Recruit size | $c_o(z') = N(\mu_r, \sigma_r); \mu_r = 0.23; \sigma_r = 0.77$                                                                 |
| S | Survival     | $\text{logit}(s(z)) = 1.11 + 0.49(\ln(\text{size}_t)) + 0.005(N_t) - 0.28(T_G)$                                               |
|   | Flowering    | $\text{logit}(Pb(z)) = -47.12 + 33.70(\ln(\text{size}_t)) - 7.21(\ln(\text{size}_t)^2) + 0.0004(N_t) + 0.42(T_G) - 0.23(T_W)$ |
|   | Growth       | $G(z', z) = N(\mu_s, \sigma_s); \mu_s = 4.12 + 0.14(\ln(\text{size}_t)) + 0.0009(N_t) - 0.20(T_G); \sigma_s = 0.41$           |
|   | Seed prod.   | $\exp(b(z)) = 3.52 + 0.90(\ln(\text{size}_t)) + 0.0008(N_t) + 0.01(T_G) + 0.10(T_W)$                                          |
|   | Recruit size | $c_o(z') = N(\mu_r, \sigma_r); \mu_r = -0.38 + 0.00005(N_t) + 0.04(T_G) + 0.03(T_W); \sigma_r = 0.76$                         |
| T | Survival     | $\text{logit}(s(z)) = -27.59 + 0.21(\ln(\text{size}_t)) - 0.0006(N_t) + 1.91(T_G)$                                            |
|   | Flowering    | $\text{logit}(Pb(z)) = -70.28 + 35.37(\ln(\text{size}_t)) - 7.45(\ln(\text{size}_t)^2) - 0.003(N_t) + 1.83(T_G) - 0.95(T_W)$  |
|   | Growth       | $G(z', z) = N(\mu_s, \sigma_s); \mu_s = -2.88 + 0.27(\ln(\text{size}_t)) + 0.0002(N_t) + 0.32(T_G); \sigma_s = 0.49$          |
|   | Seed prod.   | $\exp(b(z)) = -12.0 + 0.80(\ln(\text{size}_t)) - 0.002(N_t) + 1.07(T_G) - 0.94(T_W)$                                          |
|   | Recruit size | $c_o(z') = N(\mu_r, \sigma_r); \mu_r = -0.65 - 0.0007(N_t) + 0.06(T_G) - 0.16(T_W); \sigma_r = 0.77$                          |
| U | Survival     | $\text{logit}(s(z)) = -14.02 + 0.39(\ln(\text{size}_t)) + 0.006(N_t) + 0.87(T_G)$                                             |
|   | Flowering    | $\text{logit}(Pb(z)) = -22.83 + 16.0(\ln(\text{size}_t)) - 3.66(\ln(\text{size}_t)^2) + 0.002(N_t) + 0.19(T_G) - 1.01(T_W)$   |
|   | Growth       | $G(z', z) = N(\mu_s, \sigma_s); \mu_s = 0.40 + 0.25(\ln(\text{size}_t)) - 0.001(N_t) + 0.10(T_G); \sigma_s = 0.46$            |
|   | Seed prod.   | $\exp(b(z)) = -14.33 + 0.59(\ln(\text{size}_t)) + 0.001(N_t) + 1.18(T_G) - 1.17(T_W)$                                         |
|   | Recruit size | $c_o(z') = N(\mu_r, \sigma_r); \mu_r = -0.56 - 0.00002(N_t) + 0.05(T_G) + 0.09(T_W); \sigma_r = 0.81$                         |
| V | Survival     | $\text{logit}(s(z)) = -6.78 + 0.24(\ln(\text{size}_t)) - 0.08(N_t) + 0.69(T_G)$                                               |



|    |              |                                                                                                                                 |
|----|--------------|---------------------------------------------------------------------------------------------------------------------------------|
|    | Flowering    | $\text{logit}(Pb(z)) = -36.50 + 18.80(\ln(\text{size}_t)) - 3.57(\ln(\text{size}_t)^2) - 0.02(N_t) + 0.79(T_G) + 0.09(T_W)$     |
|    | Growth       | $G(z', z) = N(\mu_s, \sigma_s); \mu_s = -1.83 + 0.17(\ln(\text{size}_t)) + 0.0003(N_t) + 0.23(T_G); \sigma_s = 0.42$            |
|    | Seed prod.   | $\exp(b(z)) = 8.44 + 1.32(\ln(\text{size}_t)) + 0.003(N_t) - 0.43(T_G) - 0.18(T_W)$                                             |
|    | Recruit size | $c_o(z') = N(\mu_r, \sigma_r); \mu_r = -2.01 + 0.006(N_t) + 0.13(T_G) - 0.01(T_W); \sigma_r = 0.80$                             |
| W  | Survival     | $\text{logit}(s(z)) = -32.30 + 0.38(\ln(\text{size}_t)) + 0.0008(N_t) + 2.19(T_G)$                                              |
|    | Flowering    | $\text{logit}(Pb(z)) = -311.80 + 18.72(\ln(\text{size}_t)) - 3.56(\ln(\text{size}_t)^2) - 0.002(N_t) + 17.93(T_G) - 20.46(T_W)$ |
|    | Growth       | $G(z', z) = N(\mu_s, \sigma_s); \mu_s = -2.73 + 0.22(\ln(\text{size}_t)) - 0.0006(N_t) + 0.29(T_G); \sigma_s = 0.39$            |
|    | Seed prod.   | $\exp(b(z)) = -7.07 + 1.47(\ln(\text{size}_t)) + 0.003(N_t) + 0.63(T_G)$                                                        |
|    | Recruit size | $c_o(z') = N(\mu_r, \sigma_r); \mu_r = 1.75 + 0.006(N_t) - 0.10(T_G) + 0.17(T_W); \sigma_r = 0.77$                              |
| X  | Survival     | $\text{logit}(s(z)) = -34.59 + 0.88(\ln(\text{size}_t)) + 0.001(N_t) + 2.26(T_G)$                                               |
|    | Flowering    | $\text{logit}(Pb(z)) = -43.64 + 28.21(\ln(\text{size}_t)) - 5.35(\ln(\text{size}_t)^2) - 0.001(N_t) + 0.57(T_G) + 1.33(T_W)$    |
|    | Growth       | $G(z', z) = N(\mu_s, \sigma_s); \mu_s = -7.65 + 0.16(\ln(\text{size}_t)) - 0.0000004(N_t) + 0.61(T_G); \sigma_s = 0.36$         |
|    | Seed prod.   | $\exp(b(z)) = -28.65 + 0.62(\ln(\text{size}_t)) + 0.0005(N_t) + 2.15(T_G) - 1.64(T_W)$                                          |
|    | Recruit size | $c_o(z') = N(\mu_r, \sigma_r); \mu_r = 0.48 - 0.00004(N_t) - 0.01(T_G) + 0.005(T_W); \sigma_r = 0.77$                           |
| AA | Survival     | $\text{logit}(s(z)) = -0.26 + 0.54(\ln(\text{size}_t))$                                                                         |
|    | Flowering    | $\text{logit}(Pb(z)) = -28.96 + 21.71(\ln(\text{size}_t)) - 4.14(\ln(\text{size}_t)^2)$                                         |
|    | Growth       | $G(z', z) = N(\mu_s, \sigma_s); \mu_s = 1.48 + 0.10(\ln(\text{size}_t)); \sigma_s = 0.44$                                       |
|    | Seed prod.   | $\exp(b(z)) = 3.12 + 1.24(\ln(\text{size}_t))$                                                                                  |
|    | Recruit size | $c_o(z') = N(\mu_r, \sigma_r); \mu_r = 0.23; \sigma_r = 0.77$                                                                   |
| BB | Survival     | $\text{logit}(s(z)) = -0.18 + 0.29(\ln(\text{size}_t))$                                                                         |
|    | Flowering    | $\text{logit}(Pb(z)) = -32.70 + 26.93(\ln(\text{size}_t)) - 5.73(\ln(\text{size}_t)^2)$                                         |
|    | Growth       | $G(z', z) = N(\mu_s, \sigma_s); \mu_s = 1.72 + 0.18(\ln(\text{size}_t)); \sigma_s = 0.51$                                       |
|    | Seed prod.   | $\exp(b(z)) = 3.45 + 1.17(\ln(\text{size}_t))$                                                                                  |
|    | Recruit size | $c_o(z') = N(\mu_r, \sigma_r); \mu_r = 0.19; \sigma_r = 0.77$                                                                   |

|    |              |                                                                                           |
|----|--------------|-------------------------------------------------------------------------------------------|
| CC | Survival     | $\text{logit}(s(z)) = -1.23 + 0.76(\ln(\text{size}_t))$                                   |
|    | Flowering    | $\text{logit}(Pb(z)) = -45.81 + 38.00(\ln(\text{size}_t)) - 8.03(\ln(\text{size}_t)^2)$   |
|    | Growth       | $G(z', z) = N(\mu_s, \sigma_s); \mu_s = 1.57 + 0.12(\ln(\text{size}_t)); \sigma_s = 0.44$ |
|    | Seed prod.   | $\exp(b(z)) = 3.21 + 1.22(\ln(\text{size}_t))$                                            |
|    | Recruit size | $c_o(z') = N(\mu_r, \sigma_r); \mu_r = 0.13; \sigma_r = 0.77$                             |
| DD | Survival     | $\text{logit}(s(z)) = 2.43 - 0.23(\ln(\text{size}_t))$                                    |
|    | Flowering    | $\text{logit}(Pb(z)) = -86.83 + 71.52(\ln(\text{size}_t)) - 14.65(\ln(\text{size}_t)^2)$  |
|    | Growth       | $G(z', z) = N(\mu_s, \sigma_s); \mu_s = 1.93 + 0.25(\ln(\text{size}_t)); \sigma_s = 0.56$ |
|    | Seed prod.   | $\exp(b(z)) = 6.01 + 0.34(\ln(\text{size}_t))$                                            |
|    | Recruit size | $c_o(z') = N(\mu_r, \sigma_r); \mu_r = 0.30; \sigma_r = 0.69$                             |
| EE | Survival     | $\text{logit}(s(z)) = 0.65 + 0.15(\ln(\text{size}_t))$                                    |
|    | Flowering    | $\text{logit}(Pb(z)) = -24.35 + 17.91(\ln(\text{size}_t)) - 3.49(\ln(\text{size}_t)^2)$   |
|    | Growth       | $G(z', z) = N(\mu_s, \sigma_s); \mu_s = 1.85 + 0.20(\ln(\text{size}_t)); \sigma_s = 0.52$ |
|    | Seed prod.   | $\exp(b(z)) = 2.51 + 1.54(\ln(\text{size}_t))$                                            |
|    | Recruit size | $c_o(z') = N(\mu_r, \sigma_r); \mu_r = 0.09; \sigma_r = 0.86$                             |
| FF | Survival     | $\text{logit}(s(z)) = 1.50 - 0.32(\ln(\text{size}_t))$                                    |
|    | Flowering    | $\text{logit}(Pb(z)) = -70.62 + 54.30(\ln(\text{size}_t)) - 10.46(\ln(\text{size}_t)^2)$  |
|    | Growth       | $G(z', z) = N(\mu_s, \sigma_s); \mu_s = 1.65 + 0.21(\ln(\text{size}_t)); \sigma_s = 0.46$ |
|    | Seed prod.   | $\exp(b(z)) = 1.91 + 1.39(\ln(\text{size}_t))$                                            |
|    | Recruit size | $c_o(z') = N(\mu_r, \sigma_r); \mu_r = 0.10; \sigma_r = 0.92$                             |
| GG | Survival     | $\text{logit}(s(z)) = 0.99 + 0.12(\ln(\text{size}_t))$                                    |
|    | Flowering    | $\text{logit}(Pb(z)) = -50.32 + 36.50(\ln(\text{size}_t)) - 6.54(\ln(\text{size}_t)^2)$   |
|    | Growth       | $G(z', z) = N(\mu_s, \sigma_s); \mu_s = 1.48 + 0.28(\ln(\text{size}_t)); \sigma_s = 0.38$ |
|    | Seed prod.   | $\exp(b(z)) = 3.06 + 1.22(\ln(\text{size}_t))$                                            |
|    | Recruit size | $c_o(z') = N(\mu_r, \sigma_r); \mu_r = 0.18; \sigma_r = 0.81$                             |
| HH | Survival     | $\text{logit}(s(z)) = 0.74 + 0.33(\ln(\text{size}_t))$                                    |
|    | Flowering    | $\text{logit}(Pb(z)) = -50.91 + 40.17(\ln(\text{size}_t)) - 7.81(\ln(\text{size}_t)^2)$   |
|    | Growth       | $G(z', z) = N(\mu_s, \sigma_s); \mu_s = 1.62 + 0.18(\ln(\text{size}_t)); \sigma_s = 0.39$ |
|    | Seed prod.   | $\exp(b(z)) = 4.20 + 0.97(\ln(\text{size}_t))$                                            |
|    | Recruit size | $c_o(z') = N(\mu_r, \sigma_r); \mu_r = 0.24; \sigma_r = 0.76$                             |
| II | Survival     | $\text{logit}(s(z)) = -0.26 + 0.06(\ln(\text{size}_t))$                                   |
|    | Flowering    | $\text{logit}(Pb(z)) = -41.11 + 36.347(\ln(\text{size}_t)) - 8.31(\ln(\text{size}_t)^2)$  |
|    | Growth       | $G(z', z) = N(\mu_s, \sigma_s); \mu_s = 1.67 + 0.16(\ln(\text{size}_t)); \sigma_s = 0.38$ |
|    | Seed prod.   | $\exp(b(z)) = 4.92 + 0.41(\ln(\text{size}_t))$                                            |

|    |              |                                                                                            |
|----|--------------|--------------------------------------------------------------------------------------------|
|    | Recruit size | $c_o(z') = N(\mu_r, \sigma_r); \mu_r = 0.22; \sigma_r = 0.71$                              |
| JJ | Survival     | $\text{logit}(s(z)) = 0.07 + 0.16(\ln(\text{size}_t))$                                     |
|    | Flowering    | $\text{logit}(Pb(z)) = -24.83 + 19.82(\ln(\text{size}_t)) - 4.20(\ln(\text{size}_t)^2)$    |
|    | Growth       | $G(z', z) = N(\mu_s, \sigma_s); \mu_s = 1.63 + 0.32(\ln(\text{size}_t)); \sigma_s = 0.44$  |
|    | Seed prod.   | $\exp(b(z)) = 4.63 + 0.66(\ln(\text{size}_t))$                                             |
|    | Recruit size | $c_o(z') = N(\mu_r, \sigma_r); \mu_r = 0.09; \sigma_r = 0.82$                              |
| KK | Survival     | $\text{logit}(s(z)) = -0.26 + 0.25(\ln(\text{size}_t))$                                    |
|    | Flowering    | $\text{logit}(Pb(z)) = -27.90 + 27.66(\ln(\text{size}_t)) - 7.00(\ln(\text{size}_t)^2)$    |
|    | Growth       | $G(z', z) = N(\mu_s, \sigma_s); \mu_s = 1.56 + 0.30(\ln(\text{size}_t)); \sigma_s = 0.41$  |
|    | Seed prod.   | $\exp(b(z)) = 5.72 - 0.09(\ln(\text{size}_t))$                                             |
|    | Recruit size | $c_o(z') = N(\mu_r, \sigma_r); \mu_r = 0.80; \sigma_r = 0.79$                              |
| LL | Survival     | $\text{logit}(s(z)) = -0.22 + 0.77(\ln(\text{size}_t))$                                    |
|    | Flowering    | $\text{logit}(Pb(z)) = -147.87 + 121.01(\ln(\text{size}_t)) - 24.82(\ln(\text{size}_t)^2)$ |
|    | Growth       | $G(z', z) = N(\mu_s, \sigma_s); \mu_s = 1.61 + 0.10(\ln(\text{size}_t)); \sigma_s = 0.39$  |
|    | Seed prod.   | $\exp(b(z)) = 1.98 + 1.57(\ln(\text{size}_t))$                                             |
|    | Recruit size | $c_o(z') = N(\mu_r, \sigma_r); \mu_r = 0.16; \sigma_r = 0.68$                              |
| MM | Survival     | $\text{logit}(s(z)) = -1.13 + 0.60(\ln(\text{size}_t))$                                    |
|    | Flowering    | $\text{logit}(Pb(z)) = -45.56 + 39.31(\ln(\text{size}_t)) - 8.64(\ln(\text{size}_t)^2)$    |
|    | Growth       | $G(z', z) = N(\mu_s, \sigma_s); \mu_s = 1.34 + 0.14(\ln(\text{size}_t)); \sigma_s = 0.40$  |
|    | Seed prod.   | $\exp(b(z)) = 0.71 + 2.00(\ln(\text{size}_t))$                                             |
|    | Recruit size | $c_o(z') = N(\mu_r, \sigma_r); \mu_r = 0.32; \sigma_r = 0.64$                              |
| NN | Survival     | $\text{logit}(s(z)) = -1.74 + 1.39(\ln(\text{size}_t))$                                    |
|    | Flowering    | $\text{logit}(Pb(z)) = -27.89 + 20.50(\ln(\text{size}_t)) - 3.99(\ln(\text{size}_t)^2)$    |
|    | Growth       | $G(z', z) = N(\mu_s, \sigma_s); \mu_s = 1.17 + 0.13(\ln(\text{size}_t)); \sigma_s = 0.33$  |
|    | Seed prod.   | $\exp(b(z)) = 5.49 + 0.14(\ln(\text{size}_t))$                                             |
|    | Recruit size | $c_o(z') = N(\mu_r, \sigma_r); \mu_r = 0.24; \sigma_r = 0.78$                              |

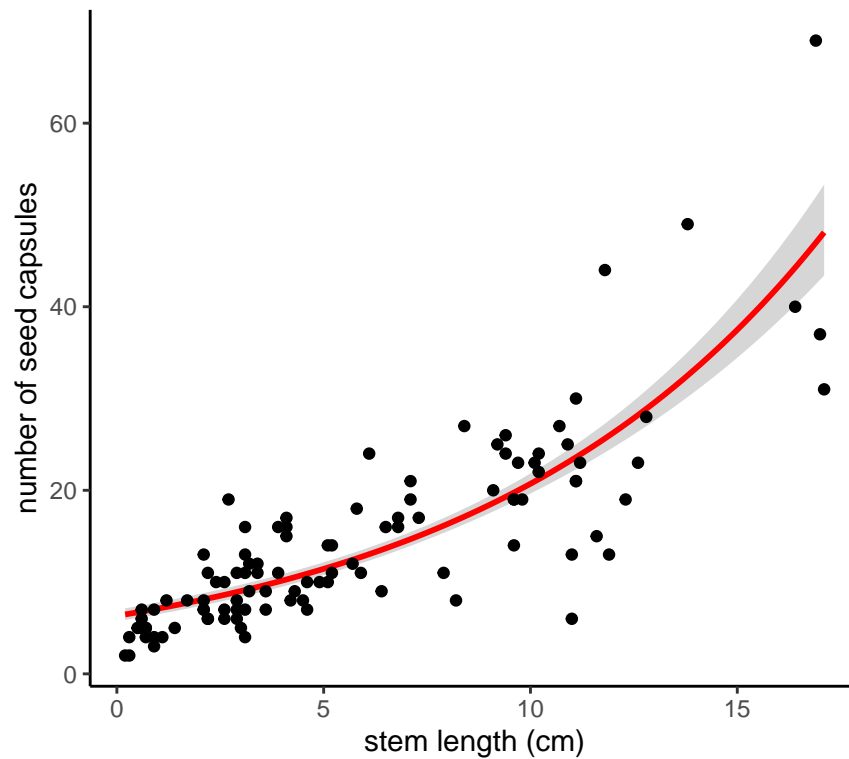

79 Figure S2: As the stem length of an *Oenothera coloradensis* flowering individual increases,  
80 the number of capsules it produces increases as well. The red line shows the fit from a  
81 Poisson generalized linear model, and the grey ribbon shows the 95% confidence interval  
82 around the fitted relationship. Model equation: Number of capsules =  $e^{(1.843+0.119 \times S)}$ , where  
83  $S$  is stem length in cm (pseudo R-squared = 0.42,  $P = < 0.01$ , Residual deviance = 186.98,  
84  $df = 104$ ).

85 Table S3: Comparison of vital rate models with and without density dependence. The  
 86 “DI” and “DD” rows contain AIC values for each vital rate model in each subpopulation  
 87 for models that are density-independent (DI) and density-dependent (DD). The difference  
 88 between the AIC of DI and DD models is shown in the  $\Delta$ AIC column. Bold text indicates  
 89 that the  $|\Delta|$ AIC value is  $> 3$ , which means that including a term for density dependence  
 90 substantially changed that vital rate model. A positive  $|\Delta|$ AIC indicates that including  
 91 density dependence improved the model, while a negative value indicates that including  
 92 density dependence made model fit worse. AIC values for DI and DD values can be found  
 93 in Table S3.

| Vital Rate Model |              | Subpopulation |                  |                  |               |              |        |
|------------------|--------------|---------------|------------------|------------------|---------------|--------------|--------|
|                  |              | Crow<br>Creek | Diamond<br>Creek | Unnamed<br>Creek | HQ5           | HQ3          | Meadow |
| Survival         | DI           | 776.58        | 1012.68          | 2684.34          | 3242.63       | 716.66       | 166.13 |
|                  | DD           | 757.84        | 905.39           | 26848.74         | 2922.91       | 637.84       | 166.83 |
|                  | $\Delta$ AIC | <b>18.74</b>  | <b>107.28</b>    | -0.41            | <b>320.33</b> | <b>78.82</b> | -0.70  |
| Growth           | DI           | 510.34        | 953.29           | 1098.95          | 1570.93       | 300.18       | 116.54 |
|                  | DD           | 506.61        | 931.15           | 1068.14          | 1112.78       | 269.73       | 113.88 |
|                  | $\Delta$ AIC | <b>3.73</b>   | <b>22.15</b>     | <b>30.811</b>    | <b>458.15</b> | <b>30.45</b> | 2.66   |
| Flowering        | DI           | 371.68        | 523.30           | 1087.93          | 538.52        | 191.46       | 104.24 |
|                  | DD           | 373.31        | 523.74           | 1087.48          | 483.99        | 193.22       | 106.96 |
|                  | $\Delta$ AIC | -1.63         | -0.44            | 0.45             | <b>54.52</b>  | -1.76        | -1.72  |
| Seed production  | DI           | 842.00        | 1580.85          | 2815.89          | 1423.02       | 598.75       | 280.09 |
|                  | DD           | 835.59        | 1566.83          | 2817.19          | 1419.32       | 594.63       | 281.45 |
|                  | $\Delta$ AIC | <b>6.41</b>   | <b>14.02</b>     | -1.29            | <b>3.71</b>   | <b>4.12</b>  | -1.35  |
| Recruit size     | DI           | 921.31        | 1028.23          | 3378.43          | 4629.87       | 967.83       | 173.03 |
|                  | DD           | 923.24        | 1026.63          | 3380.53          | 4631.84       | 969.06       | 175.02 |
|                  | $\Delta$ AIC | -1.93         | 1.61             | -1.93            | -1.97         | -1.23        | -1.99  |

94 **References**

- 95 Burgess, L. M., Hild, A. L., & Shaw, N. L. (2005). Capsule treatments to enhance seedling  
96 emergence of *Gaura neomexicana* ssp. *coloradensis*. *Restoration Ecology*, *13*(1), 8–14.  
97 [https://doi.org/ 10.1111/j.1526-100X.2005.00002.x](https://doi.org/10.1111/j.1526-100X.2005.00002.x)
- 98 *Endangered and threatened wildlife and plants; removing Oenothera coloradensis (colorado*  
99 *butterfly plant) from the federal list of endangered and threatened plants.* (2019). 50  
100 C.F.R. pt. 17. ([https://www.federalregister.gov/documents/2019/11/05/2019-](https://www.federalregister.gov/documents/2019/11/05/2019-24124/endangered-and-threatened-wildlife-and-plants-removing-oenothera-coloradensis-colorado-butterfly)  
101 [24124/endangered-and-threatened-wildlife-and-plants-removing-oenothera-](https://www.federalregister.gov/documents/2019/11/05/2019-24124/endangered-and-threatened-wildlife-and-plants-removing-oenothera-coloradensis-colorado-butterfly)  
102 [coloradensis-colorado-butterfly](https://www.federalregister.gov/documents/2019/11/05/2019-24124/endangered-and-threatened-wildlife-and-plants-removing-oenothera-coloradensis-colorado-butterfly))
- 103 Fertig, W. (2000). *Status review of the colorado butterfly plant (gaura neomexicana ssp.*  
104 *coloradensis)* (Tech. Rep.). Laramie, WY: Prepared for U.S. Fish and Wildlife Ser-  
105 vice and F. E. Warren Air Force Base by the Wyoming Natural Diversity Database  
106 (University of Wyoming).
- 107 Floyd, S. K., & Ranker, T. A. (1998). Analysis of a Transition Matrix Model for *Gaura*  
108 *neomexicana* Ssp . *coloradensis* (Onagraceae) Reveals Spatial and Temporal Demo-  
109 graphic Variability. *International Journal of Plant Sciences*, *159*(5), 853–863.
- 110 Heidel, B., Tuthill, D., & Wallace, Z. (2021). *33-Year Population Trends of Colorado*  
111 *Butterfly Plant (Oenothera Coloradensis; Onagraceae), a Short-Lived Riparian Species*  
112 *on F. E. Warren Air Force Base, Laramie County, Wyoming* (Tech. Rep.). Laramie,  
113 WY: Prepared for U.S. Fish and Wildlife Service and F. E. Warren Air Force Base by  
114 the Wyoming Natural Diversity Database (University of Wyoming).
- 115 Krakos, K. (2013). personal communication with Bonnie Heidel.
- 116 Munk, L. M., Hild, A. L., & Whitson, T. D. (2002). Rosette recruitment of a rare en-  
117 demic forb (*Gaura neomexicana* subsp. *coloradensis*) with canopy removal of associ-  
118 ated species. *Restoration Ecology*, *10*(1), 122–128. [https://doi.org/ 10.1046/j.1526-](https://doi.org/10.1046/j.1526-100X.2002.10113.x)  
119 [100X.2002.10113.x](https://doi.org/10.1046/j.1526-100X.2002.10113.x)
